# Supplementary material for: Arsenic immobilization as crystalline scorodite by gas-diffusion electrocrystallization
Source: Royal Society of Chemistry journal article supplement (doi:10.1039/d0re00054j), 2020-01-01
Supplement: d0re00054j1.pdf [file d0re00054j1.pdf]

## SUPPLEMENTARY INFORMATION

### **Arsenic immobilization as crystalline scorodite by gas-diffusion electrocrystallization.**

G. Pozo<sup>1,3</sup>, D. Van Houtven<sup>1,3</sup>, J. Fransaer<sup>2,3</sup> and X. Dominguez-Benetton<sup>1,3</sup>

*<sup>1</sup>Separation and Conversion Technologies, VITO-Flemish Institute for Technological Research, Boeretang 200, 2400, Mol, Belgium.*

*<sup>2</sup>Department of Materials Engineering, Surface and Interface Engineered Materials, Katholieke Universiteit Leuven, Kasteelpark Arenberg 44 - box 2450, 3001 Leuven, Belgium.*

*<sup>3</sup> SIM vzw, Technologiemark 935, BE-9052 Zwijnaarde, Belgium.*

*\* Correspondence should be addressed to:*

*Xochitl Dominguez-Benetton, Separation and Conversion Technologies, VITO, Flemish Institute for Technological Research, Boeretang 200, 2400, Mol, Belgium*

Phone: +3214336926; E-mail: [xoch@vito.be](mailto:xoch@vito.be)

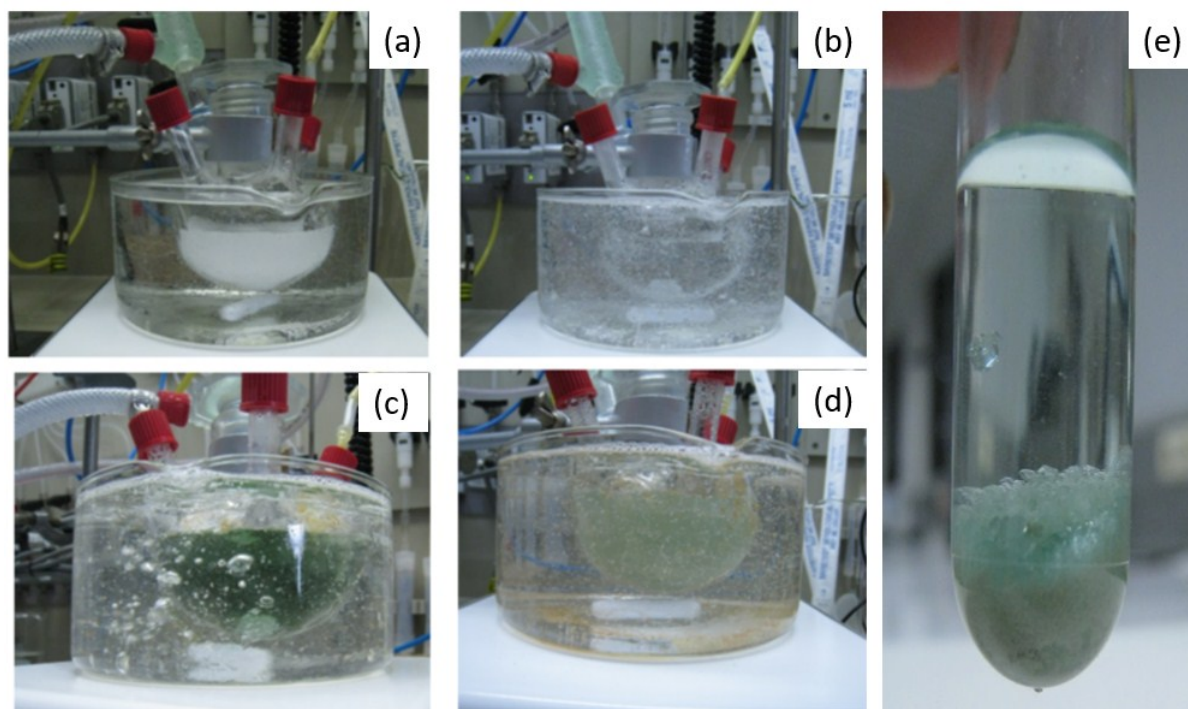

**Figure ESI1.** Experimental sequence for the chemical precipitation of scorodite. (a) Insoluble 0.22 M  $\text{As}^{5+}$  at room temperature ( $\sim 18\text{ }^{\circ}\text{C}$ ), (b) setup at  $50\text{ }^{\circ}\text{C}$  showing  $\text{As}^{5+}$  dissolved. (c) Solution turning into green color after the addition of 1.25 M  $\text{Fe}^{2+}$ , d) after 18 hours at  $95\text{ }^{\circ}\text{C}$  with a constant flow of  $\text{O}_2$  and (e) green-gray precipitates formed by chemical precipitation.

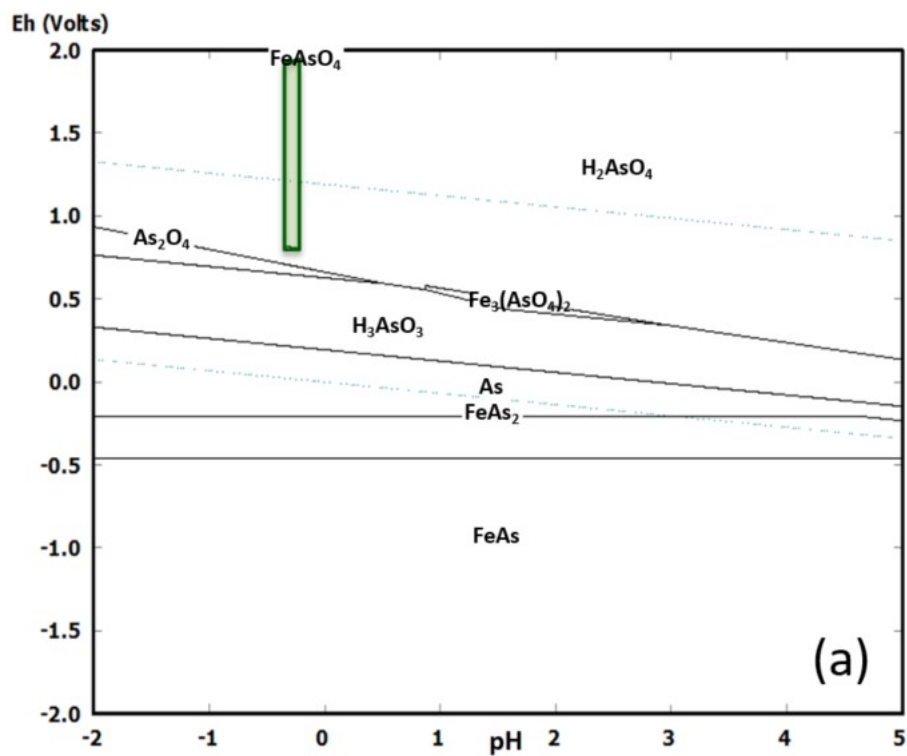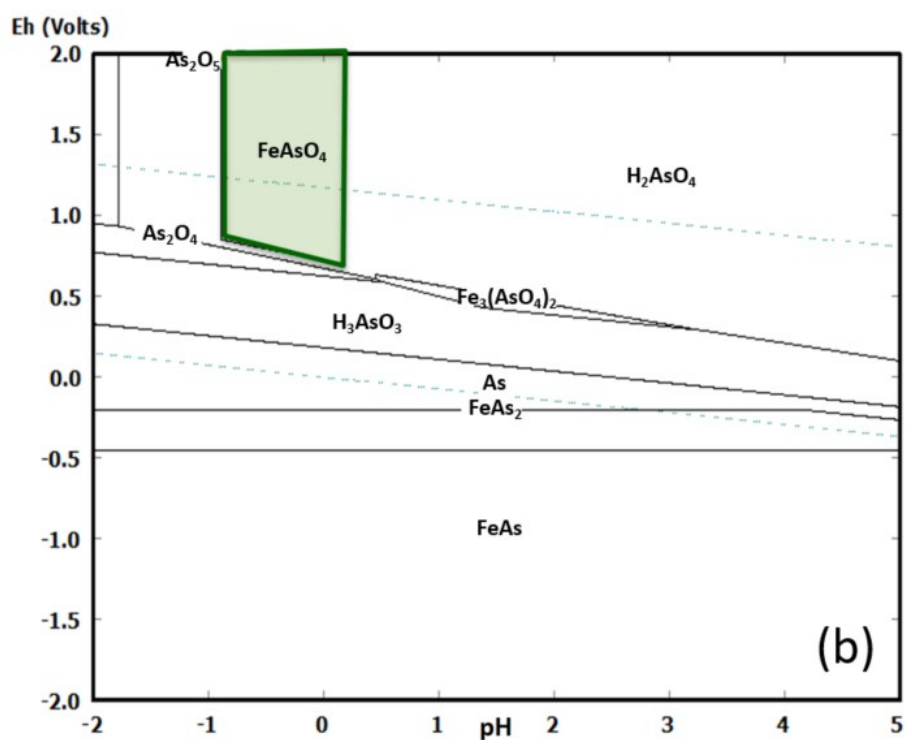

**Figure ESI2.** E-pH diagrams for As-Fe-H<sub>2</sub>O system ( $\Sigma$  As = 0.04 M and  $\Sigma$  Fe = 0.27 M) at a) 70 °C and b) 95 °C using HSC-Chemistry 9.0 software.

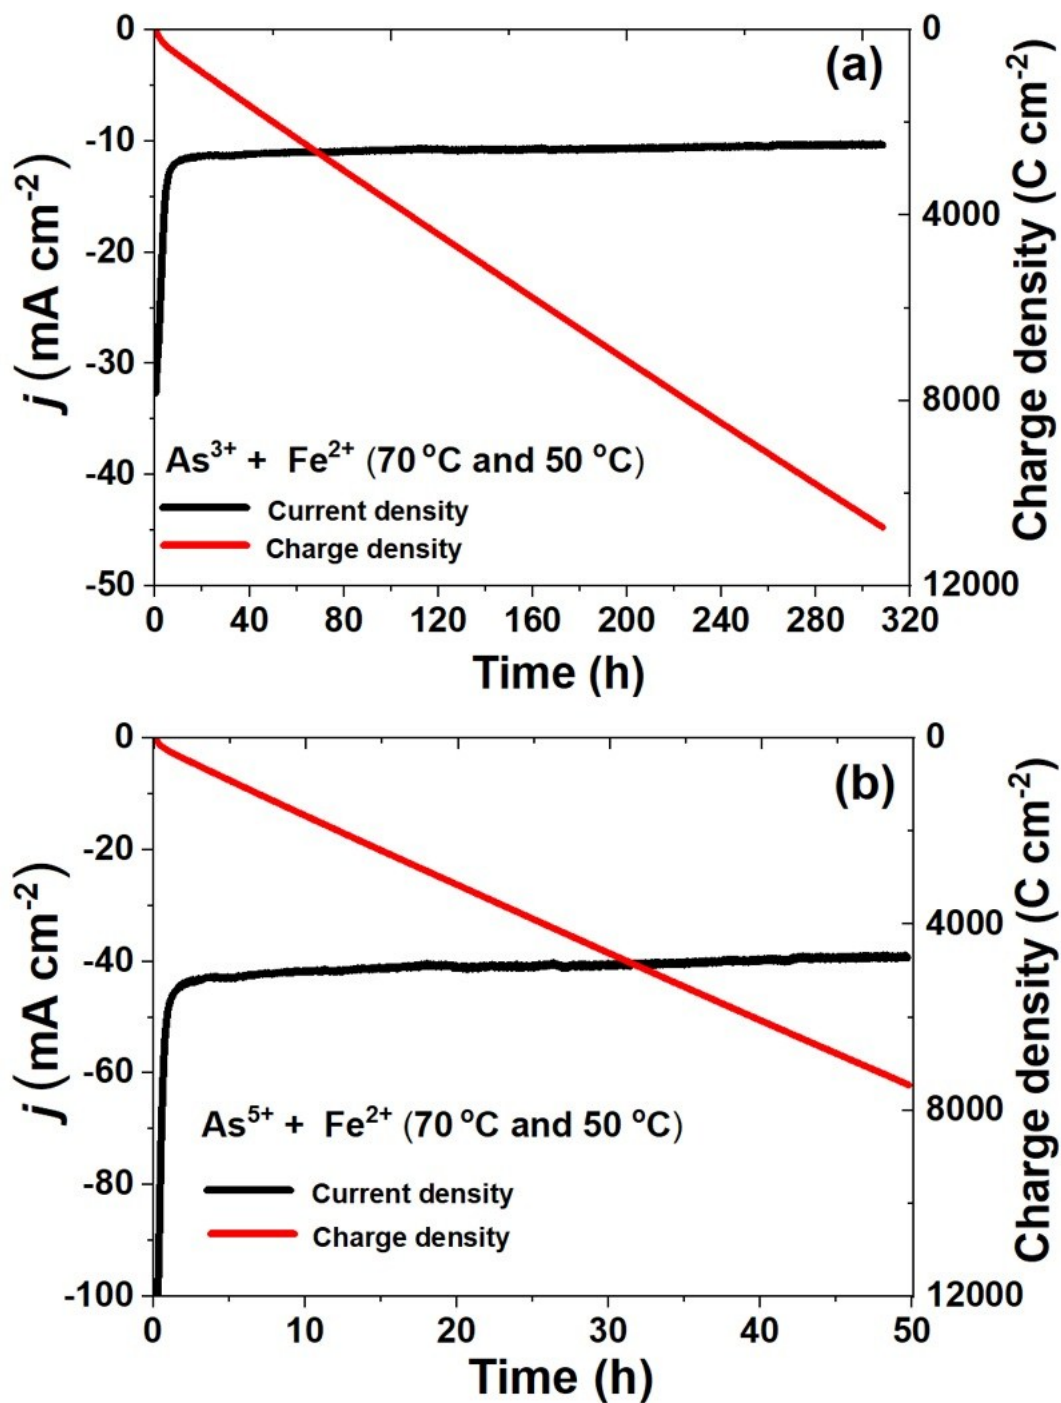

**Figure ESI3.** Chronoamperometry test at  $-0.15 \text{ V}_{\text{SHE}}$ . a)  $\text{As}^{3+}$  and  $\text{Fe}^{2+}$  as precursors at 50 °C and 70 °C and b)  $\text{As}^{5+}$  and  $\text{Fe}^{2+}$  as precursors at 50 °C and 70 °C.

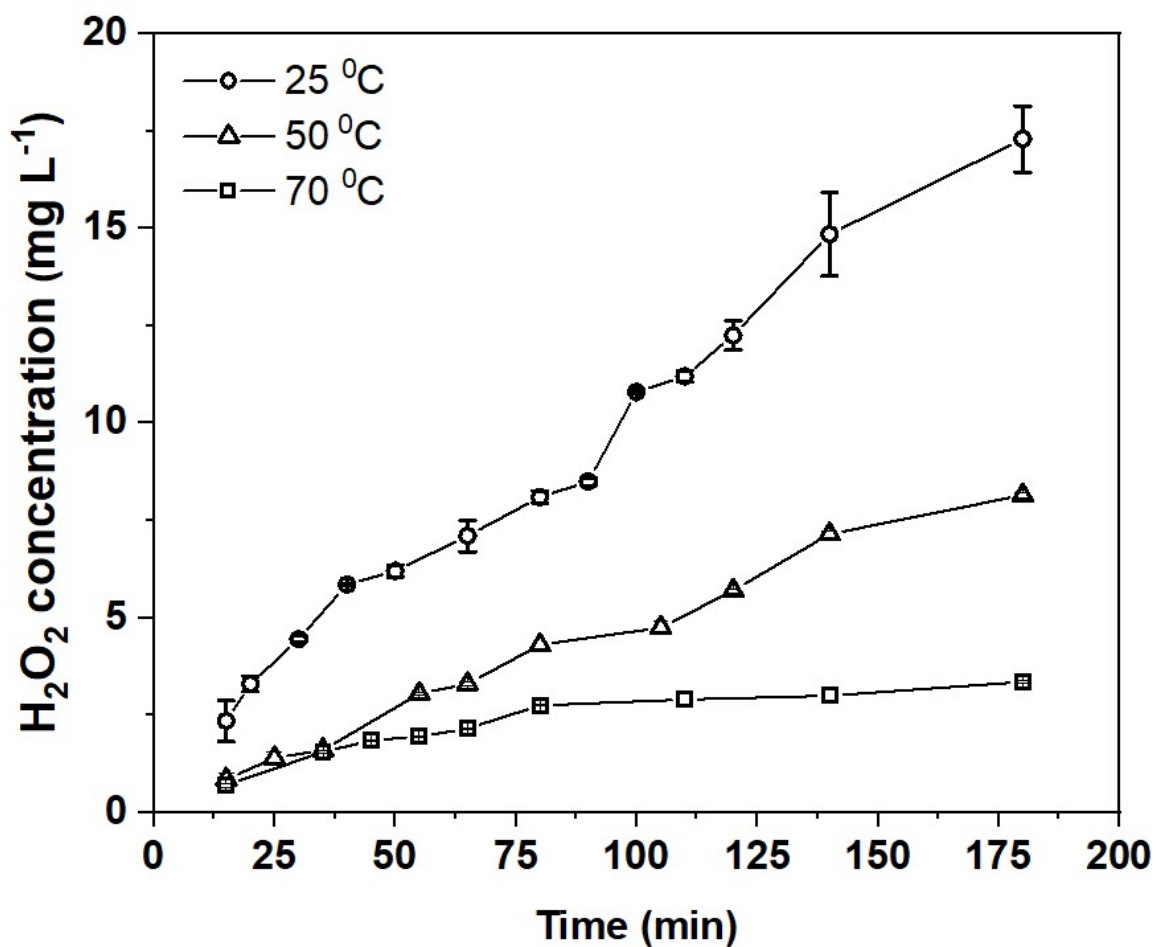

**Figure ESI4.** Effect of temperature on the production of H<sub>2</sub>O<sub>2</sub> after the electrochemical reduction of oxygen at  $-0.15V_{\text{SHE}}$  using 0.3 M Na<sub>2</sub>SO<sub>4</sub> at pH 2.2 (pH adjusted with H<sub>2</sub>SO<sub>4</sub>) at 25 °C, 50 °C and 70 °C.

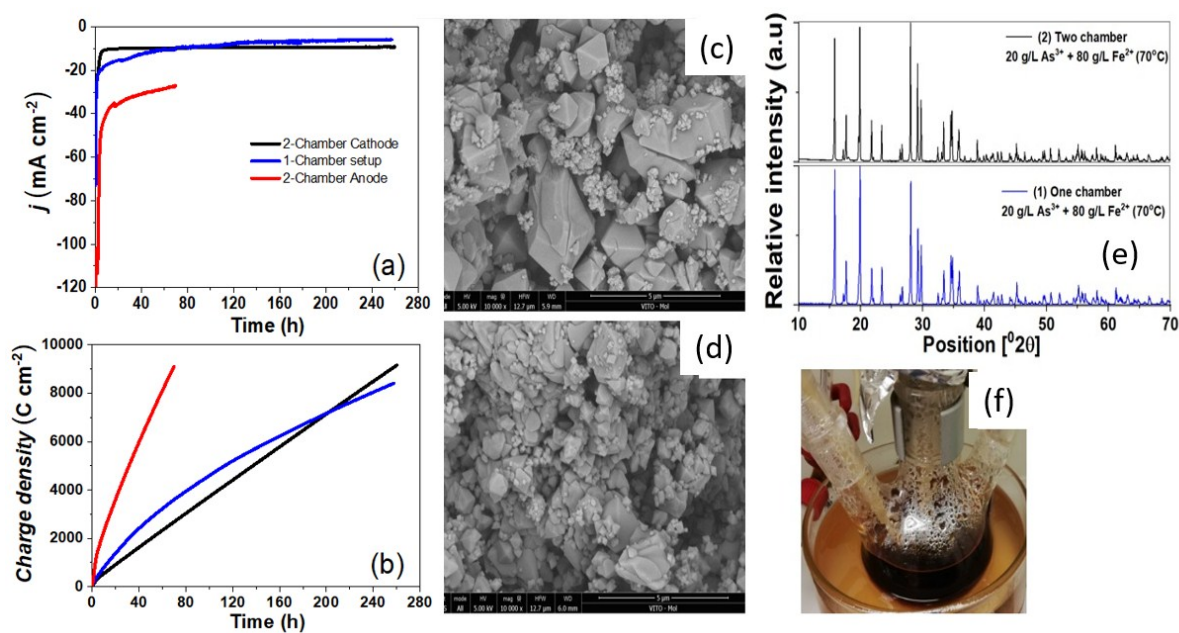

**Figure ESI5.** Comparison of the three GDEx operation modes and product characterization. Current densities (a) and charge consumption (b) under the three different strategies. SEM image of scorodite made with two-chamber GDEx (c) and one-chamber GDEx (d). XRD pattern (black) of scorodite precipitate in the cathode side (GDE side) in a two-chamber setup and with one chamber reactor (e). Anolyte solution after the two-chamber operation, where the  $\text{As}^{3+}$  and  $\text{Fe}^{2+}$  precursor were fed in the anode side without scorodite precipitation (f).

**Table ESI1.** Summary of the GDEx operational conditions using different precursors and synthesis temperatures.

|                                        | <b>Precursor</b>                        |                                         |                                         |                                         |
|----------------------------------------|-----------------------------------------|-----------------------------------------|-----------------------------------------|-----------------------------------------|
|                                        | <b>As<sup>3+</sup>, Fe<sup>2+</sup></b> | <b>As<sup>3+</sup>, Fe<sup>2+</sup></b> | <b>As<sup>5+</sup>, Fe<sup>2+</sup></b> | <b>As<sup>5+</sup>, Fe<sup>2+</sup></b> |
| Temperature (°C)                       | 50                                      | 70                                      | 50                                      | 70                                      |
| pH                                     | 0.0                                     | 0.0                                     | 0.0                                     | 0.0                                     |
| Conductivity (mS cm <sup>-1</sup> )    | 122                                     | 122                                     | 153                                     | 153                                     |
| Total charge consumed (C)              | 107,350                                 | 96,713                                  | 77,131                                  | 74,540                                  |
| Processing time (h)                    | 308                                     | 304                                     | 53                                      | 50                                      |
| Current density (mA cm <sup>-2</sup> ) | 10 ± 2                                  | 9 ± 3                                   | 39 ± 7                                  | 41 ± 1                                  |
| Charge density (C cm <sup>-2</sup> )   | 10,735                                  | 9,671                                   | 7,713                                   | 7,454                                   |

**Table ESI2.** Summary of the GDEx operational conditions at different feeding strategies.

| <b>Experiment</b>                      | <b>Two-chamber setup, wherein As<sup>3+</sup> and Fe<sup>2+</sup> were supplied to the cathode chamber (side of the GDE)</b> | <b>One-chamber setup without a Nafion membrane</b> | <b>Two-chamber GDEx by feeding the precursor in the anode side without contact with the GDE</b> |
|----------------------------------------|------------------------------------------------------------------------------------------------------------------------------|----------------------------------------------------|-------------------------------------------------------------------------------------------------|
| Precursor                              | As <sup>3+</sup> , Fe <sup>2+</sup>                                                                                          | As <sup>3+</sup> , Fe <sup>2+</sup>                | As <sup>3+</sup> , Fe <sup>2+</sup>                                                             |
| Temperature (°C)                       | 70                                                                                                                           | 70                                                 | 70                                                                                              |
| Total charge consumed (C)              | 91,550                                                                                                                       | 84,050                                             | 90,920                                                                                          |
| Processing time (h)                    | 260                                                                                                                          | 257                                                | 70                                                                                              |
| Current density (mA cm <sup>-2</sup> ) | 9 ± 3                                                                                                                        | 9 ± 4                                              | 34 ± 8                                                                                          |
| Charge density (C cm <sup>-2</sup> )   | 9,155                                                                                                                        | 8,405                                              | 9,092                                                                                           |

**Table ESI3.** Crystallite size and lattice parameters obtained from XRD data through Rietveld refinement of scorodite synthesized under different conditions.

| Precursor                           | Temperature<br>(°C) | Reactor setup | Crystallite<br>size (nm) | Lattice parameters (nm) |      |   |
|-------------------------------------|---------------------|---------------|--------------------------|-------------------------|------|---|
|                                     |                     |               |                          | a                       | b    | c |
| As <sup>3+</sup> , Fe <sup>2+</sup> | 50                  | Two-chamber   | 71 ± 2                   | 0.89                    | 1.03 | 1 |
| As <sup>3+</sup> , Fe <sup>2+</sup> | 70                  | Two-chamber   | 108 ± 0                  | 0.89                    | 1.03 | 1 |
| As <sup>5+</sup> , Fe <sup>2+</sup> | 50                  | Two-chamber   | 70 ± 6                   | 0.90                    | 1.03 | 1 |
| As <sup>5+</sup> , Fe <sup>2+</sup> | 70                  | Two-chamber   | 66 ± 4                   | 0.90                    | 1.03 | 1 |
| As <sup>3+</sup> , Fe <sup>2+</sup> | 70                  | One-chamber   | 79 ± 3                   | 0.90                    | 1.03 | 1 |
